# Supplementary material for: The potential role of circRNA_004229 in hair/epidermal regulation after MED1 ablation in keratinocytes
Source: Royal Society of Chemistry journal article supplement (doi:10.1039/c9ra02322d), 2019-01-01
Supplement: c9ra02322d1.pdf [file c9ra02322d1.pdf]

### Supplementary information

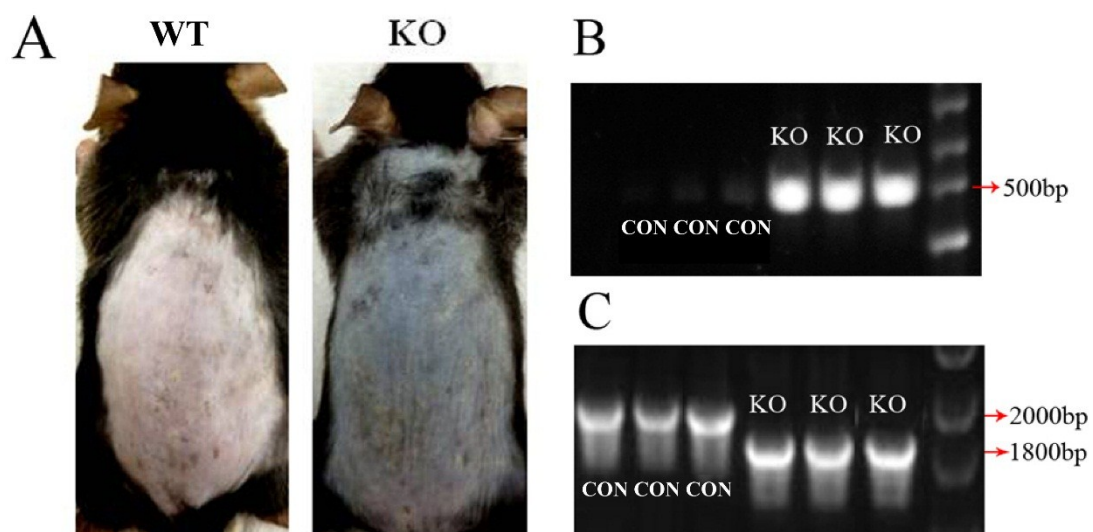

**Supplementary Fig. 1** Phenotype and genotype of KO mice. (A) Phenotype of MED1 KO (KO) mice and wild type (WT) mice. (B&C) Genotype of MED1 KO mice and the WT mice was further confirmed by PCR, bands corresponding to 500bp are K14 cre and corresponding to 2000bp or 1800bp are MED1.

**Supplementary table 1.** Comparison of MED1 KO mice vs WT mice for the top 15 up-regulated expression of circRNAs (fold change > 2 and p-value < 0.05) sorted by their fold change (FC)

| circRNA            | Symbol   | FC        | p-value | MRE1             | MRE2             | MRE3            | MRE4            | MRE5              |
|--------------------|----------|-----------|---------|------------------|------------------|-----------------|-----------------|-------------------|
| mmu_circRNA_017277 | Xylt1    | 3.6524748 | 0.0379  | mmu-miR-30c-1-3p | mmu-miR-30c-2-3p | mmu-miR-6539    | mmu-miR-466b-5p | mmu-miR-466b-5p   |
| mmu_circRNA_43963  | Fam118b  | 3.4432945 | 0.0456  | mmu-miR-6342     | mmu-miR-1907     | mmu-miR-7214-5p | mmu-miR-6353    | mmu-miR-7232-5p   |
| mmu_circRNA_31491  | Slc25a46 | 3.1530016 | 0.027   | mmu-miR-670-5p   | mmu-miR-8091     | mmu-miR-6339    | mmu-miR-7008-3p | mmu-miR-7002-3p   |
| mmu_circRNA_44267  | Lingo1   | 2.9846941 | 0.0153  | mmu-miR-7058-5p  | mmu-miR-677-3p   | mmu-miR-7048-5p | mmu-miR-6921-5p | mmu-miR-6915-5p   |
| mmu_circRNA_000043 | Ctnd2    | 2.9483043 | 0.0346  | mmu-miR-6957-3p  | mmu-miR-1903     | mmu-miR-1247-5p | mmu-miR-7240-3p | mmu-miR-3098-3p   |
| mmu_circRNA_43493  | Wdr59    | 2.9454849 | 0.0287  | mmu-miR-7022-5p  | mmu-miR-7673-5p  | mmu-miR-7001-5p | mmu-miR-485-5p  | mmu-miR-3075-5p   |
| mmu_circRNA_21095  | Rasal2   | 2.8575167 | 0.023   | mmu-miR-6899-3p  | mmu-miR-207      | mmu-miR-7117-3p | mmu-miR-6950-3p | mmu-miR-7012-5p   |
| mmu_circRNA_002017 | Cluh     | 2.84526   | 0.0401  | mmu-miR-7029-3p  | mmu-miR-3547-3p  | mmu-miR-3544-3p | mmu-miR-8103    | mmu-miR-6938-3p   |
| mmu_circRNA_24115  | Spop     | 2.7759251 | 0.0332  | mmu-miR-146a-5p  | mmu-miR-6991-5p  | mmu-miR-146b-5p | mmu-miR-29b-3p  | mmu-miR-6988-5p   |
| mmu_circRNA_22656  | Ptprr    | 2.7564992 | 0.0226  | mmu-miR-5110     | mmu-miR-6918-5p  | mmu-miR-7660-3p | mmu-miR-7065-3p | mmu-miR-8118      |
| mmu_circRNA_27181  | Kat6b    | 2.7368076 | 0.0282  | mmu-miR-5620-5p  | mmu-miR-7016-3p  | mmu-miR-7054-5p | mmu-miR-149-3p  | mmu-miR-5110      |
| mmu_circRNA_40922  | Ncapd2   | 2.6952734 | 0.0328  | mmu-miR-221-5p   | mmu-miR-7226-3p  | mmu-miR-935     | mmu-miR-5623-5p | mmu-miR-763       |
| mmu_circRNA_38433  | Rnf4     | 2.6904882 | 0.0438  | mmu-miR-7092-3p  | mmu-miR-466i-3p  | mmu-miR-669b-3p | mmu-miR-466b-3p | mmu-miR-466c-3p   |
| mmu_circRNA_013002 | Ttc3     | 2.6664586 | 0.0351  | mmu-miR-7661-5p  | mmu-miR-7092-3p  | mmu-miR-466c-5p | mmu-miR-7012-5p | mmu-miR-3473d     |
| mmu_circRNA_21283  | Pea15a   | 2.6269989 | 0.0277  | mmu-miR-5110     | mmu-miR-6919-3p  | mmu-miR-7081-5p | mmu-miR-7684-5p | mmu-miR-125b-1-3p |

**Supplementary table 2.** Comparison of MED1 KO mice vs WT mice for the top 15 down-regulated expression of circRNAs (fold change > 2 and p-value < 0.05) sorted by their fold change (FC)

| circRNA            | Symbol  | FC        | p-value | MRE1               | MRE2              | MRE3            | MRE4            | MRE5             |
|--------------------|---------|-----------|---------|--------------------|-------------------|-----------------|-----------------|------------------|
| mmu_circRNA_21503  | Rrp15   | 13.224342 | 0.0294  | mmu-miR-7011-3p    | mmu-miR-7231-3p   | mmu-miR-207     | mmu-miR-6943-3p | mmu-miR-6971-3p  |
| mmu_circRNA_29480  | Opa1    | 10.23337  | 0.0306  | mmu-miR-7663-5p    | mmu-miR-7048-3p   | mmu-miR-3967    | mmu-miR-7077-3p | mmu-miR-141-5p   |
| mmu_circRNA_40207  | Tpk1    | 9.9376559 | 0.0265  | mmu-miR-199b-5p    | mmu-miR-15a-3p    | mmu-miR-199a-5p | mmu-miR-7089-3p | mmu-miR-7680-5p  |
| mmu_circRNA_42011  | Pde2a   | 9.3072768 | 0.0143  | mmu-miR-7665-3p    | mmu-miR-6992-5p   | mmu-miR-450b-5p | mmu-miR-6360    | mmu-miR-6988-5p  |
| mmu_circRNA_25091  | Npas3   | 7.8788388 | 0.022   | mmu-miR-6909-5p    | mmu-miR-365-1-5p  | mmu-miR-7035-5p | mmu-miR-7005-5p | mmu-miR-365-2-5p |
| mmu_circRNA_43955  | Ets1    | 6.0251338 | 0.0299  | mmu-miR-7094b-2-5p | mmu-miR-3087-5p   | mmu-miR-871-3p  | mmu-miR-7093-5p | mmu-miR-3084-5p  |
| mmu_circRNA_39714  | Wdr95   | 5.2530686 | 0.0248  | mmu-miR-125a-3p    | mmu-miR-6340      | mmu-miR-22-5p   | mmu-miR-717     | mmu-miR-15b-5p   |
| mmu_circRNA_34157  | Qser1   | 4.8651352 | 0.0485  | mmu-miR-7030-3p    | mmu-miR-7214-5p   | mmu-miR-5709-3p | mmu-miR-8116    | mmu-miR-6974-3p  |
| mmu_circRNA_013298 | Birc6   | 4.4025402 | 0.046   | mmu-miR-6357       | mmu-miR-6985-5p   | mmu-let-7k      | mmu-miR-326-5p  | mmu-miR-683      |
| mmu_circRNA_25830  | Rian    | 4.2376513 | 0.0376  | mmu-miR-7015-5p    | mmu-miR-7222-3p   | mmu-miR-6963-5p | mmu-miR-216a-3p | mmu-miR-6539     |
| mmu_circRNA_20185  | Ica11   | 4.1526965 | 0.0161  | mmu-miR-873b       | mmu-miR-7094-1-5p | mmu-miR-107-3p  | mmu-miR-103-3p  | mmu-miR-7084-3p  |
| mmu_circRNA_004229 | Fmn1    | 4.11381   | 0.0115  | mmu-miR-207        | mmu-miR-7235-3p   | mmu-miR-667-5p  | mmu-miR-149-5p  | mmu-miR-6914-5p  |
| mmu_circRNA_28916  | Ttll8   | 3.9106999 | 0.0246  | mmu-miR-7074-5p    | mmu-miR-1903      | mmu-miR-1892    | mmu-miR-6916-3p | mmu-miR-320-5p   |
| mmu_circRNA_44122  | Zbtb16  | 3.8730615 | 0.0401  | mmu-miR-7033-5p    | mmu-miR-6914-3p   | mmu-miR-6974-3p | mmu-miR-7010-3p | mmu-miR-361-3p   |
| mmu_circRNA_24517  | Rab10os | 3.7629546 | 0.0224  | mmu-miR-6917-3p    | mmu-miR-326-5p    | mmu-miR-346-3p  | mmu-miR-7001-5p | mmu-miR-6393     |
